# Supplementary material
Source: PubMed Central journal article supplement (PMC6579624)
Supplement: NIHMS1025590-supplement-SI.pdf [file NIHMS1025590-supplement-SI.pdf]

## SUPPORTING INFORMATION:

### Hydroxyl Radicals in E-cigarette Vapor and E-vapor Oxidative Potentials under Different Vaping Patterns

Yeongkwon Son<sup>†,‡</sup>, Vladimir Mishin<sup>#</sup>, Jeffrey D. Laskin<sup>#,§</sup>, Gediminas Mainelis<sup>⊥</sup>, Olivia A. Wackowski<sup>∇,&</sup>, Cristine Delnevo<sup>∇,&</sup>, Stephan Schwander<sup>†,#,∇,%</sup>, Andrey Khlystov<sup>‡</sup>, Vera Samburova<sup>‡</sup>, Qingyu Meng<sup>†,#,∇\*</sup>

<sup>†</sup>Department of Environmental and Occupational Health, School of Public Health, Rutgers University, Piscataway, NJ, USA

<sup>‡</sup>Division of Atmospheric Sciences, Desert Research Institute, Reno, NV, USA

<sup>#</sup>Environmental and Occupational Health Sciences Institute, Rutgers University, Piscataway, NJ, USA

<sup>§</sup>Department of Pharmacology and Toxicology, Ernest Mario School of Pharmacy, Rutgers University, Piscataway, NJ, USA

<sup>⊥</sup>Department of Environmental Sciences, Rutgers University, New Brunswick, NJ, USA

<sup>∇</sup>Center for Tobacco Studies, School of Public Health, Rutgers University, Piscataway, NJ, USA

<sup>&</sup>Cancer Prevention & Control Program, Cancer Institute of New Jersey, Rutgers University, New Brunswick NJ, USA

<sup>%</sup>Office of Global Public Health Affairs, School of Public Health, Rutgers University, Piscataway, New Jersey 08854

**\*Corresponding author:** Qingyu Meng, School of Public Health, Rutgers University, 683 Hoes Lane West, Piscataway, NJ, USA. Phone: (732) 235-9754; Fax: (732) 235-4004; Email: mengqi@sph.rutgers.edu

**TABLE OF CONTENTS:**

**I. Structure, properties, and occupational exposure limits for the selected flavoring chemicals Page S3**

**II. Demographics of the study participants Page S4**

**III. E-cigarette use patterns of the 23 subjects in our study Page S4**

**IV. The detailed experimental conditions Page S5**

**V. Calibration curve for 2OHTA Page S5**

## I. Structure, properties, and occupational exposure limits for the selected flavoring chemicals

**Table S1. Characteristics of flavoring chemicals**

| Name                                  | Flavor         | Structure                                                                           | Property                                       | Occupational exposure limits (mg/m <sup>3</sup> ) |      |                |       |           |       |
|---------------------------------------|----------------|-------------------------------------------------------------------------------------|------------------------------------------------|---------------------------------------------------|------|----------------|-------|-----------|-------|
|                                       |                |                                                                                     |                                                | OSHA PEL                                          |      | ACGIH TLV      |       | NIOSH REL |       |
|                                       |                |                                                                                     |                                                | TWA                                               | STEL | TWA            | STEL  | TWA       | STEL  |
| Benzyl alcohol                        | Fruity         |    | MW: 108.14 g/mol<br>BP: 205.3 °C, VP: 0.18 kPa |                                                   |      |                |       |           |       |
| Benzyl acetate                        | Fruity         |    | MW: 150.18 g/mol<br>BP: 212 °C, VP: 0.02 kPa   | 61                                                |      | 61             |       |           |       |
| Ethyl acetate                         | Fruity         |    | MW: 88.11 g/mol<br>BP: 77.1 °C, VP: 9.7 kPa    | 1400                                              |      | 1400           |       | 1400      | 7200  |
| Anethole                              | Sweet          |    | MW: 148.21 g/mol<br>BP: 234 °C, VP: > 1 Pa     |                                                   |      |                |       |           |       |
| Citral                                | Citrus         |    | MW: 152.24 g/mol<br>BP: 229 °C, VP: 13.3 Pa    |                                                   |      | 31<br>(dermal) |       |           |       |
| Cinnamaldehyde                        | Spicy, sweet   |    | MW: 132.16 g/mol<br>BP: 248 °C, VP: > 1 Pa     |                                                   |      |                |       |           |       |
| Vanillin                              | Sweet, Fatty   |  | MW: 152.15 g/mol<br>BP: 285 °C, VP: > 1 Pa     |                                                   |      |                |       |           |       |
| 2,3-butanedione<br>(diacetyl)         | Fatty, Buttery |  | MW: 86.09 g/mol<br>BP: 88 °C, VP: 7.57 kPa     |                                                   |      | 0.035          | 0.070 | 0.018     | 0.088 |
| 2,3-pentanedione<br>(Acetylpropionyl) | Fatty, Buttery |  | MW: 100.12 g/mol<br>BP: 109.9 °C, VP: 2.67 kPa |                                                   |      |                |       | 0.038     | 0.127 |

## II. Demographics of the study participants

The demographics of the study participants are summarized in Table S2.

**Table S2. Summary of the study participants**

|                             |                                      |
|-----------------------------|--------------------------------------|
| Number of subjects          | 23                                   |
| Age                         | 25 ± 10 (18-52) years                |
| Gender                      | 21 men and 2 women                   |
| Ethnicity                   | 16 White; 1 Black; 3 Asian; 6 others |
| Duration of E-cigarette use | 1.4 ± 0.9 (0.4-4.0) years            |

## III. E-cigarette use patterns of the 23 subjects in our study

Table S3 shows the mean, the standard deviation, and the range of e-cigarette vaping topography, device power output, and nicotine contents of the 23 subjects in our study. E-cigarette device power output ranged from 5 watts to 59.7 watts, with an average power output of 13.7 watts. The average nicotine content in E-liquids was 11.9 ± 10.0 mg/mL, with a maximum nicotine level of 36 mg/mL. Most subjects used VG-based E-liquids (14 out of 23 subjects), followed by PG:VG mixed E-liquid (7 subjects), and PG-based E-liquid (2 subjects).

**Table S3. E-cigarette vaping patterns from the study subjects (N = 23)**

| Parameters          | Mean   | Standard Deviation | Percentiles |       |       |       |        |        |        |
|---------------------|--------|--------------------|-------------|-------|-------|-------|--------|--------|--------|
|                     |        |                    | Min         | 10    | 25    | 50    | 75     | 90     | Max    |
| Puff volume (mL)    | 100.17 | 55.57              | 9.99        | 38.39 | 63.58 | 90.04 | 135.62 | 160.46 | 251.13 |
| Puff duration (sec) | 3.69   | 1.16               | 1.26        | 2.08  | 3.24  | 3.85  | 4.24   | 5.06   | 5.77   |
| Puff interval (sec) | 24.30  | 17.30              | 8.01        | 11.90 | 13.86 | 18.67 | 26.35  | 67.91  | 69.39  |
| Power (W)           | 13.70  | 15.14              | 5.00        | 5.48  | 6.26  | 7.61  | 12.96  | 27.38  | 59.67  |
| Nicotine (mg/mL)    | 11.92  | 10.04              | 0.00        | 3.00  | 3.00  | 12.00 | 19.50  | 24.00  | 36.00  |

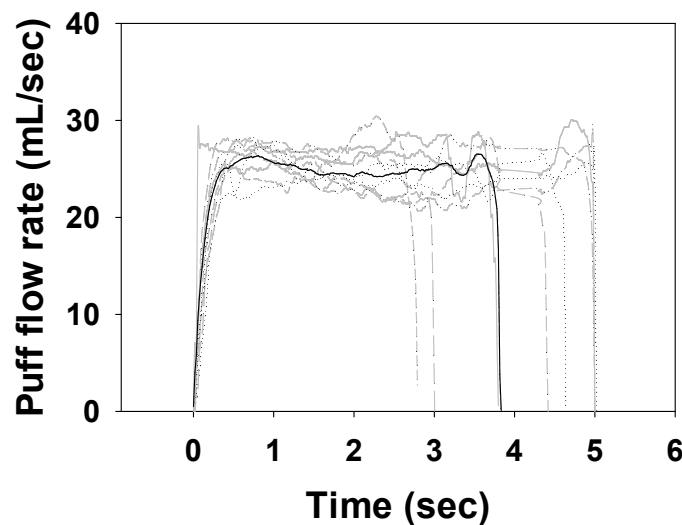

**Figure S1. E-cigarette vaping topography observed using the Cress pocket device from 23 subjects**

#### IV. The detailed experimental conditions

The e-vapor generation conditions are tabulated in Table S4.

**Table S4. The experimental factors used in the experiments**

| Experiments                           | Factors             | Settings                  | Other Settings for Particle Generation                            |
|---------------------------------------|---------------------|---------------------------|-------------------------------------------------------------------|
| <b>Device setting</b>                 | Device power (watt) | 6.4, 31.3                 | 90 mL puff volume, 3.8 sec puff duration, 12 mg/ml nicotine in VG |
|                                       | Air hole size (mm)  | 1, 1.5, 2                 |                                                                   |
| <b>Vaping topography</b>              | Puff volume (mL)    | 35, 90, 170               | 6.4W, 2 mm air hole and 12 mg/ml nicotine in VG;                  |
|                                       | Puff duration (sec) | 2, 3.8                    |                                                                   |
| <b>E-liquid base material</b>         | Base material       | PG, VG, PG&VG (v:v = 1:1) | 6.4W, 2 mm air hole, 90 mL puff volume, 3.8 sec puff duration     |
|                                       | Nicotine (mg/ml)    | 12                        |                                                                   |
| <b>E-liquid flavoring ingredients</b> | Flavor              | 8 flavors*                | 6.4W, 2 mm air hole, 90 mL puff volume, 3.8 sec puff duration, VG |
|                                       | Flavoring level (%) | 1 and 10% by volume**     |                                                                   |

\* Strawberry (Ripe), Dragonfruit, Menthol, Cinnamon, Bubblegum, Bavarian cream, Sweet cream and Graham cracker; \*\* 0.1 and 1% for cinnamon flavor

#### V. Calibration curve for 2OHTA

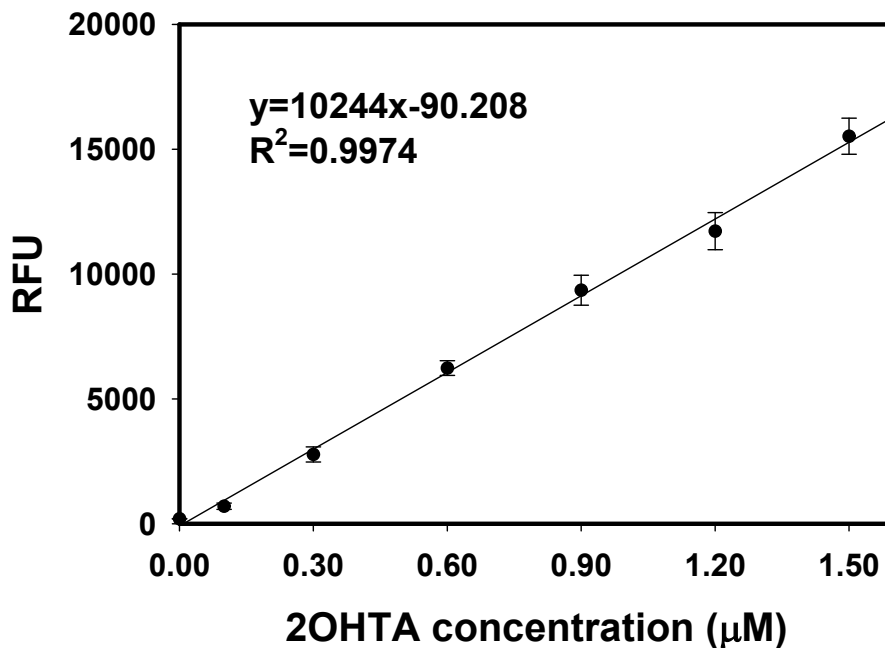

Figure S2. Calibration curve for 2OHTA
